# Supplementary material
Source: publisher figshare collection journal article supplement (https://acs.figshare.com/ndownloader/files/3841990)
Supplement: Supplementary file 1 [file 3841990]

1 Supporting Information for  
2  
3 **Effects of Sulfate during CO<sub>2</sub> Attack on Portland Cement and**  
4 **Their Impacts on Mechanical Properties under Geologic CO<sub>2</sub>**  
5 **Sequestration Conditions**  
6  
7

8 Qingyun Li,<sup>1</sup> Yun Mook Lim,<sup>2</sup> and Young-Shin Jun<sup>1</sup>, \*

9 *<sup>1</sup>Department of Energy, Environmental and Chemical Engineering,*

10 *Washington University, St. Louis, MO 63130, USA*

11 *<sup>2</sup> Department of Civil and Environmental Engineering, Yonsei University, Seoul*

12 *120-749, Republic of Korea*

13  
14 *Address: One Brookings Drive, Campus Box 1180*

15 *E-mail: [ysjun@seas.wustl.edu](mailto:ysjun@seas.wustl.edu)*

16 *Phone: (314)935-4539*

17 *Fax: (314)935-7211*

18 *<http://encl.engineering.wustl.edu/>*  
19  
20  
21

22 **Environmental Science & Technology**

23 **Summary**

24 15 pages, including 3 Tables and 11 Figures.

## S1.Experimental setups

A bench-top reactor (Parr Instrument Company, IL) was connected to a syringe gas pump (Teledyne ISCO, Lincoln, NE). The pressure in the reactor was monitored by a barometer (Parr Instrument Company, IL) on the cap of the reactor. A controller connected to an *in situ* thermocouple automatically turning on or off the heater when the temperature in the reactor was lower or higher than the set value. Such system was used in several previous studies in our lab.<sup>1-8</sup>

The initial pH in the reaction, after injecting CO<sub>2</sub> and obtaining high temperature, can be measured by a pH probe designed for high pressures (1–139 bar) and temperatures (20–120 °C) (Corr Instruments, TX).<sup>1, 3, 4, 7, 8</sup> Because our *in situ* pH probe is glass-based, and could be damaged if contacted with a locally basic aqueous environment, we did not monitor the pH increase as a function of time during reactions. Instead, we used Geochemists' Workbench (GWB, Release 8.0, RockWare, Inc.) to calculate the possible evolution of pH in our systems containing CO<sub>2</sub> (Details are available in Section S4.3).

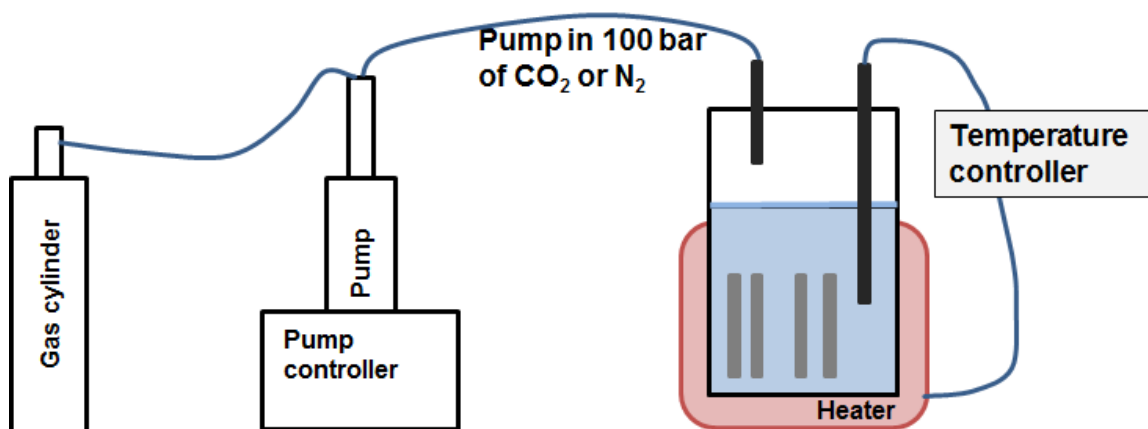

**Figure S1** Experimental setup for high temperature/pressure experiments, adopted from our concurrent study.<sup>9</sup> The temperature is controlled at 95°C and the pressure is controlled at 100 bar.

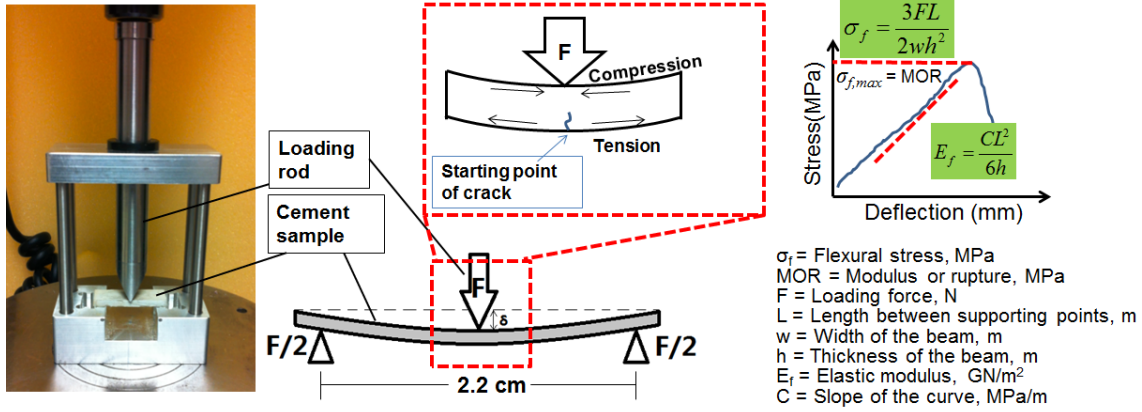

**Figure S2.** Diagram of three-point bending test, adopted from our concurrent study.<sup>9</sup> Loading force ( $F$ ) and the deflection of the beam ( $\delta$ ) were recorded. During the bending process, the top surface of the beam has the maximum compression stress, and the bottom surface has the maximum tensile stress. Failure starts from the bottom surface. A typical stress curve is also shown.

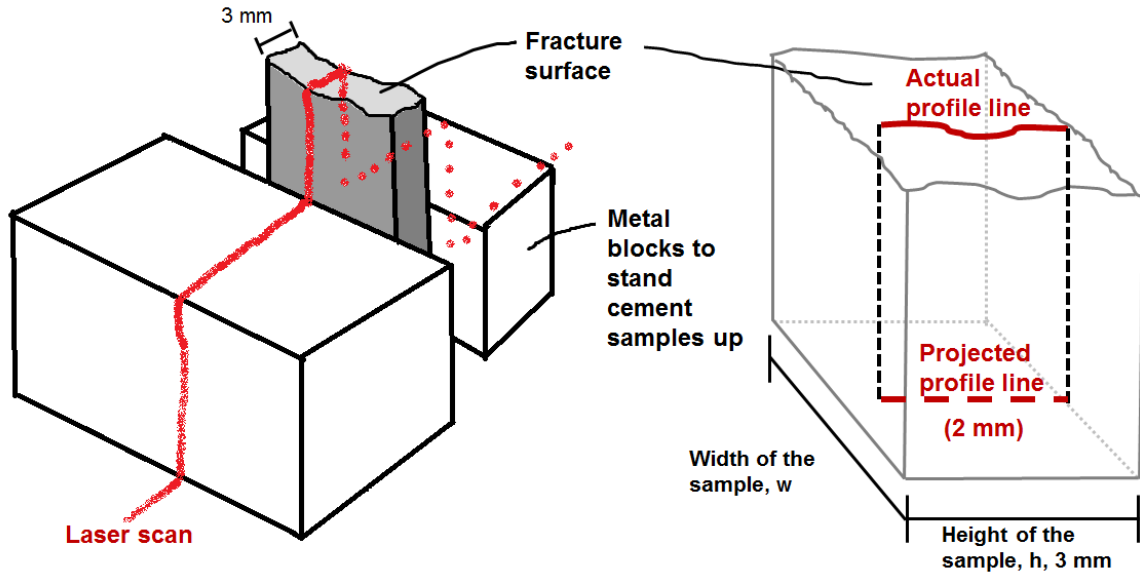

**Figure S3.** Diagram for quantification of fracture roughness by a laser scanner (left), and an example profile line (right). This figure is adopted from our concurrent study.<sup>9</sup> Each sample has  $\sim 100$  profile lines, with projected lines parallel to the  $h$  direction. The profile

line roughness ( $R_L$ ) is calculated as the ratio of the length of actual profile line to the length of projected line. Each ~ 2 mm profile line is given by 21 points, including the end-points.

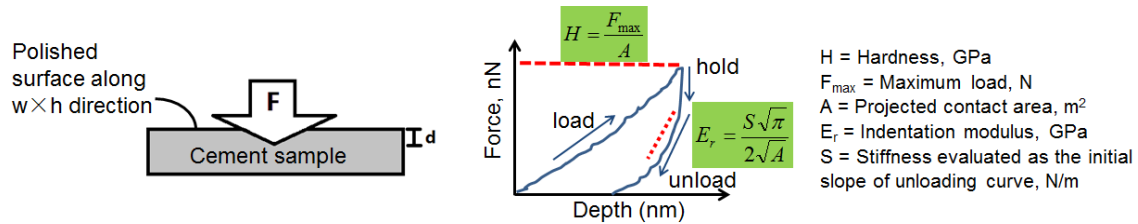

**Figure S4.** Diagram of nanoindentation, adopted from our concurrent study.<sup>9</sup> A typical indentation curve is shown on the right.

## S2 Additional data for chemical analyses

Aqueous concentrations of Ca and Si were measured at the end of the 10 days' reaction (Table S1). The aqueous concentration of Ca should not be used for comparison of cement dissolution under acidic conditions, because they could be much less than the true loss of Ca from the cement samples. During degassing and cooling of the reactor, the high concentrations of Ca formed many secondary precipitates on the surface of the cement samples. These precipitates were removed from the reactor together with the cement sample, without being acidified for ICP measurement. Si is less preferentially leached out, and fewer secondary Si precipitates were observed on the cement samples during sampling. Therefore, Si concentrations likely deviate less than Ca from the real concentrations before degassing and cooling of the system, and they were used to compare relative cement dissolutions.

**Table S1** Aqueous concentrations of Ca and Si at the end of the 10 days' reaction. Data for the N<sub>2</sub> and the CO<sub>2</sub> conditions are from our concurrent study.<sup>9</sup> The positive and negative error bars are the standard deviation of 3 measurements of the same sample by ICP-OES.

| Conditions                      | Ca, mM      | Si, mM      |
|---------------------------------|-------------|-------------|
| N <sub>2</sub>                  | 9.0 ± 0.3   | 1.62 ± 0.01 |
| SO <sub>4</sub>                 | 21.7 ± 0.3  | 1.64 ± 0.02 |
| CO <sub>2</sub>                 | 147.6 ± 0.5 | 5.33 ± 0.03 |
| CO <sub>2</sub> SO <sub>4</sub> | 234 ± 1     | 3.70 ± 0.03 |

**Table S2** Thicknesses of different regions of cement attacked by CO<sub>2</sub> in this study.

| Condition                       | Region 2,<br>μm | Region 3,<br>μm | Region 4,<br>μm | Total attacked thickness,<br>μm |
|---------------------------------|-----------------|-----------------|-----------------|---------------------------------|
| CO <sub>2</sub>                 | 960 ± 100       | 100 ± 17        | 170 ± 35        | 1220 ± 90                       |
| CO <sub>2</sub> SO <sub>4</sub> | 600 ± 17        | 117 ± 6         | 80 ± 10         | 800 ± 6                         |

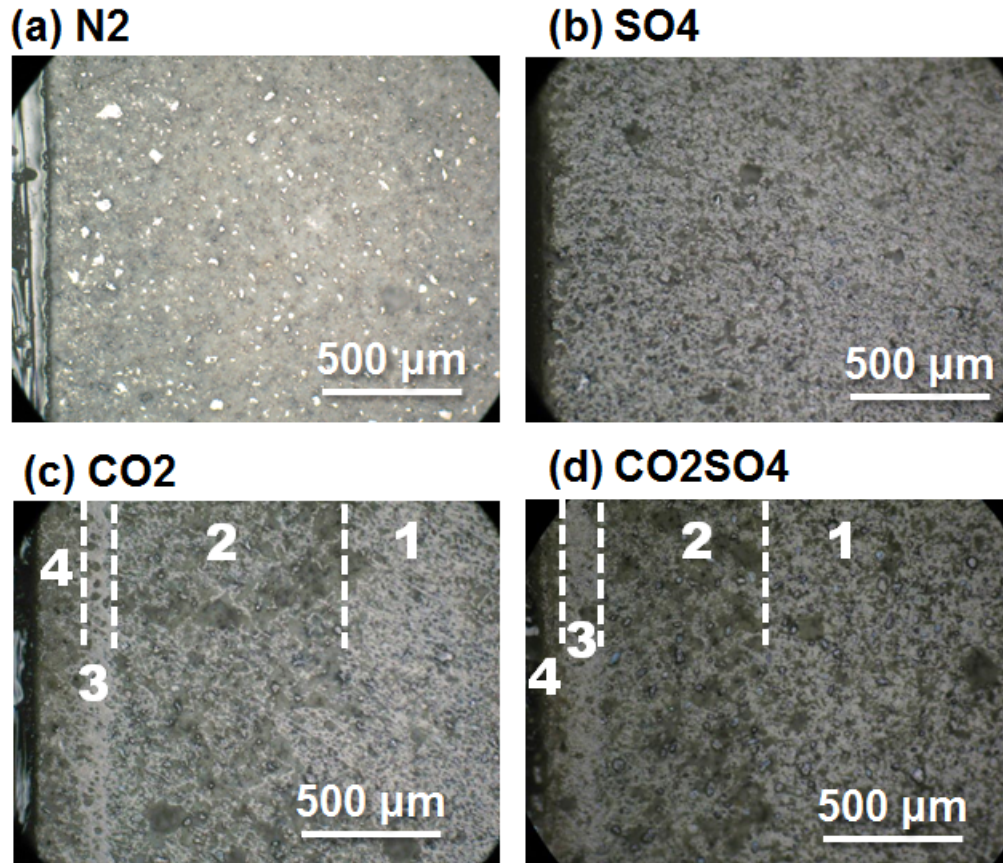

**Figure S5.** Optical images of polished cross sections of (a) N<sub>2</sub>, (b) SO<sub>4</sub>, (c) CO<sub>2</sub>, and (d) CO<sub>2</sub>SO<sub>4</sub> samples. Images (a) and (c) are adopted from our concurrent study.<sup>9</sup> The SO<sub>4</sub> image does not show any evidence of sulfate attack on cement via formation of ettringite and/or gypsum. CO<sub>2</sub> attack on cement under the CO<sub>2</sub>SO<sub>4</sub> condition is less severe than that under the CO<sub>2</sub> condition.

83 **S3. Additional data for mechanical property analyses**

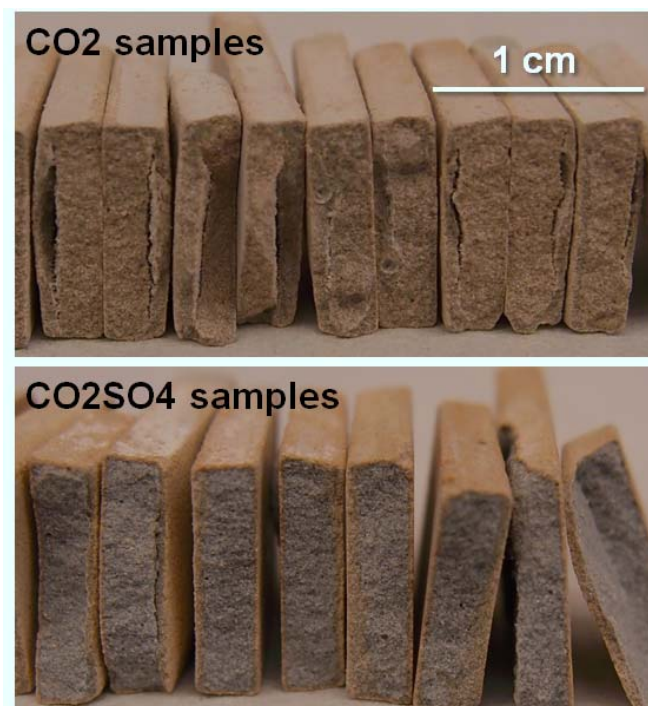

84

85 **Figure S6.** Typical fracture surfaces of the CO<sub>2</sub> and CO<sub>2</sub>SO<sub>4</sub> samples. The two pictures  
86 were taken with the same background.

87

88

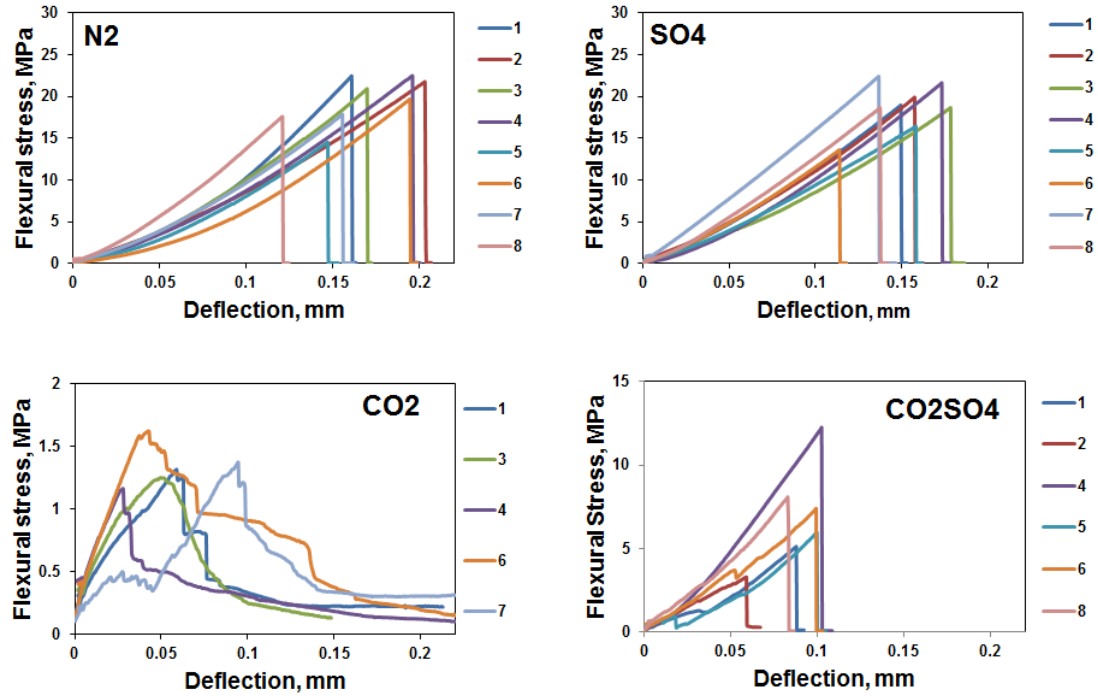

**Figure S7.** Groups of stress–deflection curves for N2, SO4, CO2, and CO2SO4. Data for N2 and CO2 samples are from our concurrent study.<sup>9</sup> The samples that were already defected before bending tests are not shown.

**Table S3** Fracture roughness comparison. Data for N2 and CO2 samples are from our concurrent study,<sup>9</sup> and are shown here for comparison. The extent of CO<sub>2</sub> attack on the cement was not sufficient to increase the fracture roughness of the CO2SO4 samples.

| Condition | Range of fracture roughness ( $R_L$ ) | Median $R_L$ | Average $R_L$ |
|-----------|---------------------------------------|--------------|---------------|
| N2        | 1.00 – 1.05                           | 1.00         | 1.02          |
| SO4       | 1.00 – 1.20                           | 1.03         | 1.06          |
| CO2       | 1.02 – 2.39                           | 1.14         | 1.35          |
| CO2SO4    | 1.00 – 1.35                           | 1.03         | 1.08          |



## 99 Hardness and Indentation Modulus

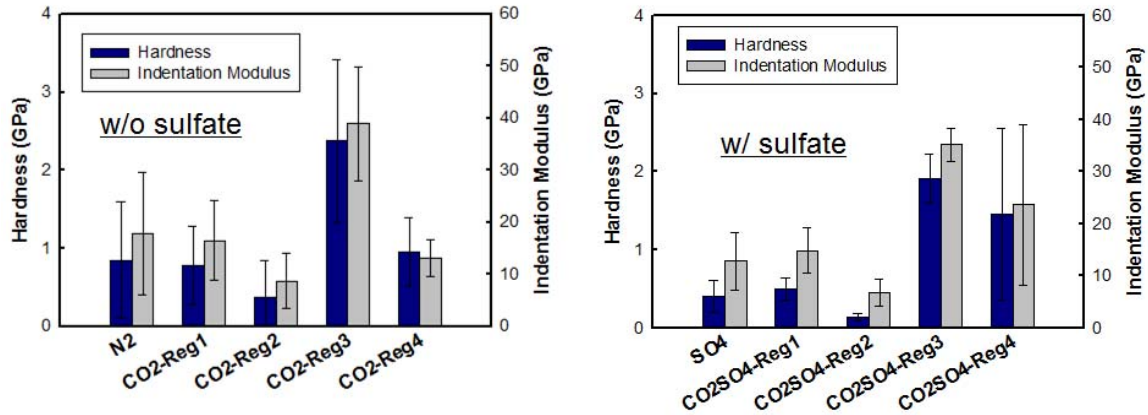

**Figure S8** Hardness and indentation modulus. Data for N2 and CO2 samples are from our concurrent study,<sup>9</sup> and are shown here for comparison. Similar to CO2 samples, the carbonated layer (Region 3) in CO2SO4 samples has 2–3 times higher hardness and indentation modulus than the intact core, while Region 2 has decreased hardness and indentation modulus, compared to the intact core. When Region 3 partially dissolves to form Region 4, the hardness and indentation modulus are also decreased.

## 107 S4. Additional discussion

### 108 S4.1 Post-cracking behaviors of reacted samples

We found that the stress–deflection curves for the CO2 samples dropped gradually after the main crack (Figure S6),<sup>9</sup> while the stress–deflection curves of samples reacted under all other conditions dropped immediately. The gradual drop of the stress–deflection curves of the CO2 samples indicated that the reaction changed the samples from brittle to quasi-brittle, and after the CO<sub>2</sub> attack, although the samples are less strong, they can absorb more energy after the main crack happens and before being completely broken. On the

other hand, the CO<sub>2</sub>SO<sub>4</sub> samples, which also experienced CO<sub>2</sub> attack, had an immediate drop in the stress–deflection curves after crack, indicating the CO<sub>2</sub> attack in these samples was not able to change the post-crack behaviors as it did in the CO<sub>2</sub> samples. The difference is consistent with our finding of thinner CO<sub>2</sub> attacked depths from both sides of samples in the CO<sub>2</sub>SO<sub>4</sub> samples (~800 μm) than those in the CO<sub>2</sub> samples (~1220 μm). Due to the thinner attacked depth, the CO<sub>2</sub>SO<sub>4</sub> samples had a thicker intact core (~1400 μm) than the CO<sub>2</sub> samples (~560 μm). The properties of the intact core are approximated by the control samples. Therefore, the CO<sub>2</sub>SO<sub>4</sub> samples' post-cracking behavior was not the same as that of the CO<sub>2</sub> samples, but was closer to the N<sub>2</sub> samples.

#### **S4.2 Effects of sulfate on Al-containing phases**

The reactions of Al-containing phases in cement (C<sub>3</sub>A and C<sub>4</sub>AF as solid solution<sup>10</sup>) start with hydration. The hydration of Al-containing phases are related to the time length of early hardening of cement. To slow down this process, a small amount of gypsum needs to be added to the clinker. The retardation effect of gypsum is based on the aqueous sulfate ions released by gypsum. There are two main hypotheses by which gypsum has its retardation effect.<sup>11</sup> One is that a hydrated layer formed together with ettringite, coating on the anhydrous grain which hinders diffusion of water into the grain. The other hypothesis is that the adsorption of sulfate ions onto the active site of Al-containing phases decreases hydration rate of the grain. Except affecting the setting time, the Al-containing phases does not contribute significantly to the mechanical properties of cement. In this study, there are more anhydrous Al-containing phases in SO<sub>4</sub> samples than in N<sub>2</sub> samples, because the excessive sulfate ions has retarded the hydration of these phases.

A system with Al-containing phases and gypsum may also affect the hydration kinetics of C<sub>2</sub>S and C<sub>3</sub>S.<sup>11</sup> However, we found that the strength and elastic modulus of N2 and SO4 samples were not significantly different.

Usually the Al-containing phases form ettringite with sulfate species at the early stage of hydration, and later on, as more Al-containing phases are hydrated and help take up sulfate, the ettringite will completely or partially convert to AFm (i.e., alumina, ferric oxide, monosulfate). Later on, with excessive sulfate, AFm will further react with sulfate to form more ettringite. Ettringite is known to have larger volume, and if excessively formed, can cause cracks in cement, which is known as “sulfate attack on cement”.<sup>12, 13</sup> In our experimental conditions, the reaction time is 10 days, likely too short for the sulfate attack to reveal, especially when the hydration of Al-containing phases are significantly retarded.

#### **S4.3 Effects of sulfate on the carbonated layer**

**pH evolution modeled by GWB** In this study, due to the fast cement dissolution at acidic pHs in the CO<sub>2</sub> and CO<sub>2</sub>SO<sub>4</sub> systems, we expected the pH increase was fast. We used Geochemists’ Workbench (GWB, Release 8.0, RockWare, Inc.) to calculate the possible evolution of pH in our systems containing CO<sub>2</sub>. Using thermo.dat as the thermodynamic database, the initial brine composition was input as the basis. Values were calculated for 1 L of solution. pH was set to balance the solution charge. The fugacity of CO<sub>2</sub> at 95 °C and 100 bar was calculate by Duan’s equation to be 75,<sup>14</sup> and was kept constant. To set up the experimentally measured initial pH in GWB, the initial pH of both the CO<sub>2</sub> and CO<sub>2</sub>SO<sub>4</sub> conditions were adjusted to be 3.0 by adding a certain amount of Cl<sup>-</sup> (i.e., HCl) and letting H<sup>+</sup> balance the charge. Only dissolution of portlandite was

considered. One or ten grams of portlandite were used as the reactant. pH evolution was plotted as a function of amount of portlandite dissolved for both CO<sub>2</sub> and CO<sub>2</sub>SO<sub>4</sub> conditions. Both systems had an equilibrium pH of 5.0. Before the equilibrium was reached, the pH of the CO<sub>2</sub>SO<sub>4</sub> samples was lower by 0–0.6 for the same amount of portlandite dissolved. Because we observed slower dissolution of cement under the CO<sub>2</sub>SO<sub>4</sub> condition, the pH difference cannot be the reason for the mitigated CO<sub>2</sub> attack observed in the CO<sub>2</sub>SO<sub>4</sub> system, and there must be other mechanisms to counteract the promotion of cement dissolution by a low pH.

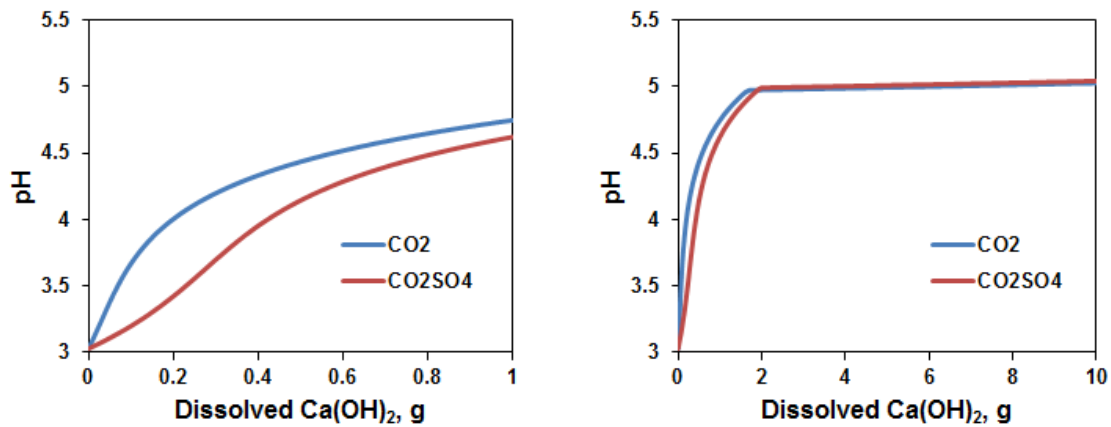

**Figure S9.** Evolution of pH in CO<sub>2</sub> and CO<sub>2</sub>SO<sub>4</sub> systems calculated by GWB.

### Observations of calcite reacted with cement samples under the CO<sub>2</sub>SO<sub>4</sub> condition

The distorted rhombohedral precipitates suggest that sulfate affected the precipitation of calcite, which is rhombohedral in a pure CaCO<sub>3</sub> system. Because the conductivity of calcite is low (even after AuPd coating), the resolution may not be able to resolve the small CaSO<sub>4</sub> precipitates on the calcite surface, if there is any. EDS may also collect most of the signal from the bulk calcite by penetrating the potential CaSO<sub>4</sub> coating.

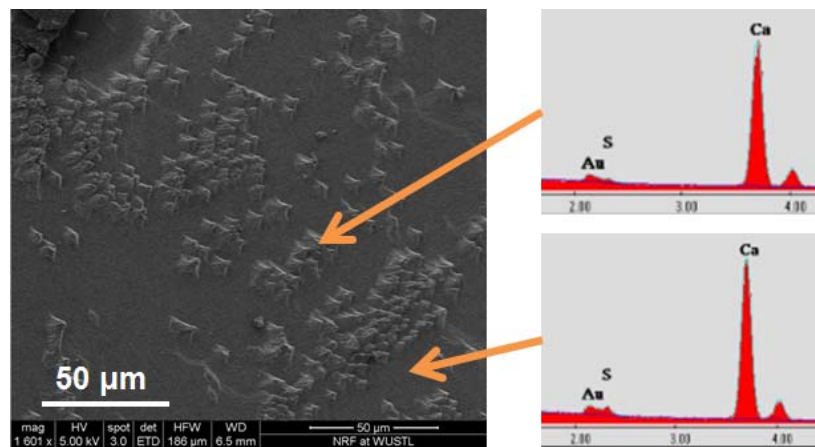

**Figure S10.** SEM-EDS results for the surface of single crystal calcite grains reacted with cement under the CO<sub>2</sub>SO<sub>4</sub> condition.

### BSE-SEM-EDS results for sulfur mapping

BSE images were obtained for the Region 3 (carbonated layer) and Region 4 from a CO<sub>2</sub>SO<sub>4</sub> sample. Sulfur mapping by EDS showed that the outer part of Region 3 has slightly more sulfur than the inner part. The region where sulfur is more abundant may have the coating of CaSO<sub>4</sub> on CaCO<sub>3</sub> grains and adsorption of sulfate on CaCO<sub>3</sub> surfaces. However, the sulfur distribution cannot specify which mechanism is the more dominant.

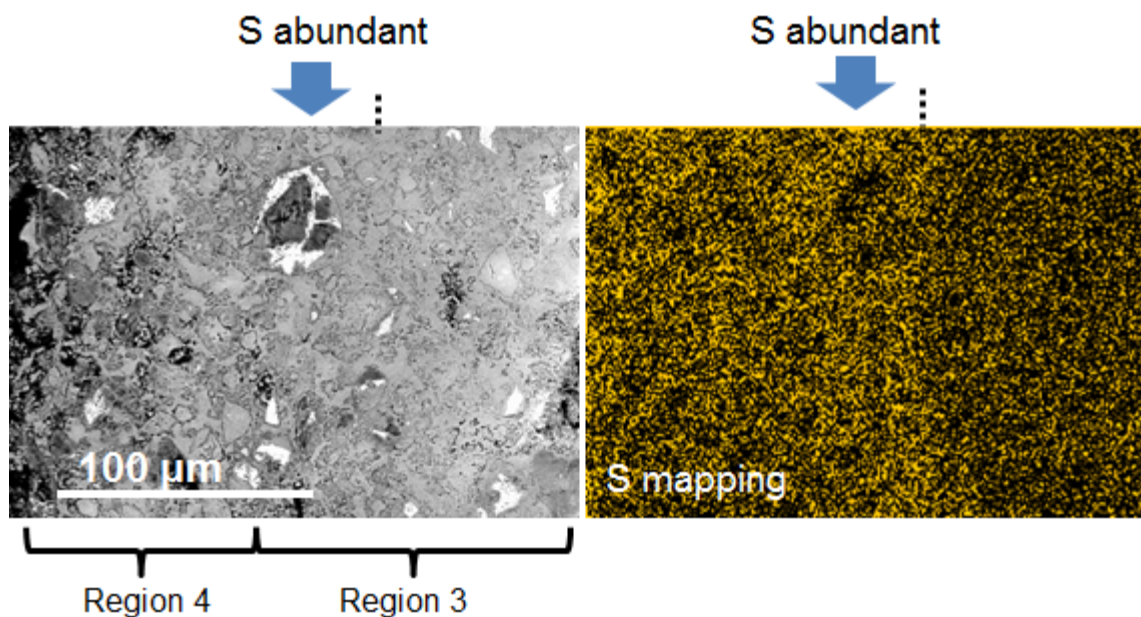

**Figure S11** BSE images of Region 3 and Region 4 in a CO<sub>2</sub>SO<sub>4</sub> sample, and the sulfur mapping by EDS. The brighter area in the EDS mapping (right) has more S. The outer edge of Region 3 has more S content than inner part of Region 3.

## 195    **References**

- 196    1.    Hu, Y.; Ray, J. R.; Jun, Y.-S., Biotite–brine Interactions under Acidic Hydrothermal  
197        Conditions: Fibrous Illite, Goethite, and Kaolinite Formation and Biotite Surface  
198        Cracking. *Environ. Sci. Technol.* **2011**, *45*, (14), 6175-6180.
- 199    2.    Hu, Y.; Ray, J. R.; Jun, Y.-S., Na<sup>+</sup>, Ca<sup>2+</sup>, and Mg<sup>2+</sup> in Brines Affect Supercritical  
200        CO<sub>2</sub>–Brine–Biotite Interactions: Ion Exchange, Biotite Dissolution, and Illite  
201        Precipitation. *Environ. Sci. Technol.* **2012**, *47*, (1), 191-197.
- 202    3.    Hu, Y.; Jun, Y.-S., Biotite Dissolution in Brine at Varied Temperatures and CO<sub>2</sub>  
203        Pressures: Its Activation Energy and Potential CO<sub>2</sub> Intercalation. *Langmuir* **2012**, *28*,  
204        (41), 14633-14641.
- 205    4.    Yang, Y.; Ronzio, C.; Jun, Y.-S., The Effects of Initial Acetate Concentration on  
206        CO<sub>2</sub>–Brine–Anorthite Interactions under Geologic CO<sub>2</sub> Sequestration Conditions.  
207        *Energy & Environmental Science* **2011**, *4*, (11), 4596-4606.
- 208    5.    Yang, Y.; Min, Y.; Jun, Y.-S., Structure-Dependent Interactions Between Alkali  
209        Feldspars and Organic Compounds: Implications for Reactions in Geologic Carbon  
210        Sequestration. *Environ. Sci. Technol.* **2012**, *47*, (1), 150-158.
- 211    6.    Yang, Y.; Min, Y.; Jun, Y.-S., A Mechanistic Understanding of Plagioclase  
212        Dissolution Based on Al Occupancy and T–O Bond Length: from Geologic Carbon  
213        Sequestration to Ambient Conditions. *Phys. Chem. Chem. Phys.* **2013**, *15*, (42),  
214        18491-18501.
- 215    7.    Shao, H.; Ray, J. R.; Jun, Y.-S., Effects of Salinity and the Extent of Water on  
216        Supercritical CO<sub>2</sub>-induced Phlogopite Dissolution and Secondary Mineral Formation.  
217        *Environ. Sci. Technol.* **2011**, *45*, (4), 1737-1743.
- 218    8.    Shao, H.; Ray, J. R.; Jun, Y.-S., Effects of Organic Ligands on Supercritical CO<sub>2</sub>-  
219        induced Phlogopite Dissolution and Secondary Mineral Formation. *Chem. Geol.*  
220        **2011**, *290*, (3), 121-132.
- 221    9.    Li, Q.; Lim, Y. M.; Flores, K. M.; Jun, Y., Chemical Reactions of Portland Cement  
222        with Aqueous CO<sub>2</sub> and Their Impacts on Cement's Mechanical Properties under CO<sub>2</sub>  
223        Sequestration Conditions. *Environ. Sci. Technol.* **2015**; DOI: 10.1021/es5063488.
- 224    10.    Taylor, H. F., *Cement Chemistry*. Thomas Telford: 1997.
- 225    11.    Quennoz, A., Hydration of C<sub>3</sub>A with Calcium Sulfate Alone and in the Presence of  
226        Calcium Silicate. **2011**.
- 227    12.    Skalny, J.; Brown, P., *Sulfate Attack on Concrete*. Taylor & Francis: 2002.
- 228    13.    Neville, A., The Confused World of Sulfate Attack on Concrete. *Cem. Concr. Res.*  
229        **2004**, *34*, (8), 1275-1296.
- 230    14.    Duan, Z.; Sun, R., An Improved Model Calculating CO<sub>2</sub> Solubility in Pure Water and  
231        Aqueous NaCl Solutions from 273 to 533 K and from 0 to 2000 bar. *Chem. Geol.*  
232        **2003**, *193*, (3), 257-271.
